# Supplementary material for: Computer-Aided Multi-Epitope Vaccine Design against Enterobacter xiangfangensis
Source: MDPI journal article supplement (doi:10.3390/ijerph19137723), 2022-06-23
Supplement: s1 [file s1]

# Supplementary Files

## Computer Aided Multi-Epitopes Vaccine Design against *Enterobacter Xiangfangensis*

Abdulrahman Alshammari<sup>1</sup>, Metab Alharbi<sup>1</sup>, Abdullah Alghamdi<sup>2</sup>, Saif Ali Alharbi<sup>3</sup>, Usman Ali Ashfaq<sup>4</sup>, Muhammad Tahir ul Qamar<sup>4,\*</sup>, Asad Ullah<sup>5</sup>, Muhammad Irfan<sup>6</sup>, Amjad khan<sup>5</sup>, Sajjad Ahmad<sup>5,\*</sup>

<sup>1</sup>Department of Pharmacology and Toxicology, College of Pharmacy, King Saud University, Post Box 2455, Riyadh, 11451, Saudi Arabia; Abdalshammari@ksu.edu.sa (A.A.); mesalharbi@ksu.edu.sa (M.A.)

<sup>2</sup>Department of Pathology and Laboratory Medicine, Riyadh Security Forces Hospital, Ministry of Interior, kingdom of Saudi Arabia; malghamdi@sflh.med.sa

<sup>3</sup>Ministry of Health, Kingdom of Saudi Arabia, Riyadh, Saudi Arabia; saif20\_07@hotmail.com

<sup>4</sup>Department of Bioinformatics and Biotechnology, Government College University Faisalabad, Faisalabad 38000, Pakistan; usmancemb@gmail.com (U.A.A.); tahirulqamar@gcu.edu.pk (M.T.Q.)

<sup>5</sup>Department of Health and Biological Sciences, Abasyn University, Peshawar 25000, Pakistan;

asadullaup@gmail.com (A.U.); sajjad.ahmad@abasyn.edu.pk (S.A.); Amjad.khan1@abasyn.edu.pk (A.K.)

<sup>6</sup>Department of Oral Biology, College of Dentistry, University of Florida, Gainesville, FL 32611, USA; irfanmuhammad@ufl.edu

\* Correspondence: (M.T.Q.); sajjad.ahmad@abasyn.edu.pk (S.A.)

**Table S1.** T-cells epitopes for the B-cell epitopes.

| MHC-I      | Percentile score | MHC-II              | Percentile score |
|------------|------------------|---------------------|------------------|
| ETITVTAAPA | 0.15             | EETITVTAAPAAQES     | 0.36             |
| TAAPAAQES  | 3.4              |                     |                  |
| GPAPTIAAKR | 0.03             | AWGPAPTIAAKRTATA    | 4.1              |
| ATKTDTPIEK | 0.02             | TATKTDTPIEKTPQ      | 0.39             |
| VTREEMDMK  | 0.46             | QSISSVVTREEMDMKQPGT | 8.01             |
| QSISSVVTRE | 4.3              |                     |                  |
| TEPLKEIQF  | 0.31             | TTEPLKEIQFKMGT      | 9.2              |
| QFKMGTDNLW | 1.2              | QFKMGTDNLWQTGFD     | 20               |
| VVPYYDANGK | 0.89             | EGTVVPYYDANGKAH     | 9.9              |
| EGDEDNKISR | 2.5              | TDFNEGDEDNKISRR     | 36               |
| VVPYYDANGK | 0.89             | GTVVPYYDANGK        | 6.2              |
| EGDEDNKISR | 2                | FNEGDEDNKISR        | 20               |
| RNNGTTAEI  | 2.9              | SAFNRNNGTTAEI       | 0.94             |
| TTAEINDQA  | 0.06             | NNGTTAEINDQAF       | 9.1              |
| RNNGTTAEI  | 2.9              | AFNRNNGTTAEI        | 1.1              |
| RNNGTTAEI  | 2.9              | NGTTAEINDQAF        | 7.5              |
| ADPANPTSGF | 13               | ADPANPTSGFSV        | 22               |
| ADPANPTSGF | 0.13             | VTYYSSASPKA         | 0.29             |
| ASPKAYESF  | 0.28             | ASPKAYESFNV         | 11               |
| QARLQMQQL  | 0.12             | EQARLQMQQLQQNNI     | 0.06             |
| MQQLQQNNI  | 2.3              |                     |                  |
| IVYFDLDKY  | 0.15             | NNIVYFDLDKYDIRS     | 0.71             |
| DLDKYDIRS  | 6.5              |                     |                  |
| GMDANGNGNM | 6.7              | GTGMDANGNGNMSSE     | 28               |
| ASNDQSGEGM | 1.5              | ASNDQSGEGMMGAGT     | 14               |
| GTPEYNISL  | 0.51             | ERGTPEYNISL         | 50               |
| AVLGHDEAAY | 0.28             | KPAVLGHDEAAYSKN     | 9.1              |
| YGKEKPAVL  | 0.01             | SYGKEKPAVLGHDEA     | 34               |

**Table S2.** Allele for major histocompatibility complex- I.

| <b>Allele</b> | <b>Length</b> |
|---------------|---------------|
| HLA-A*01:01   | 9             |
| HLA-A*01:01   | 10            |
| HLA-A*02:01   | 9             |
| HLA-A*02:01   | 10            |
| HLA-A*02:03   | 9             |
| HLA-A*02:03   | 10            |
| HLA-A*02:06   | 9             |
| HLA-A*02:06   | 10            |
| HLA-A*03:01   | 9             |
| HLA-A*03:01   | 10            |
| HLA-A*11:01   | 9             |
| HLA-A*11:01   | 10            |
| HLA-A*23:01   | 9             |
| HLA-A*23:01   | 10            |
| HLA-A*24:02   | 9             |
| HLA-A*24:02   | 10            |
| HLA-A*26:01   | 9             |
| HLA-A*26:01   | 10            |
| HLA-A*30:01   | 9             |
| HLA-A*30:01   | 10            |
| HLA-A*30:02   | 9             |
| HLA-A*30:02   | 10            |
| HLA-A*31:01   | 9             |
| HLA-A*31:01   | 10            |
| HLA-A*32:01   | 9             |
| HLA-A*32:01   | 10            |
| HLA-A*33:01   | 9             |

|             |    |
|-------------|----|
| HLA-A*33:01 | 10 |
| HLA-A*68:01 | 9  |
| HLA-A*68:01 | 10 |
| HLA-A*68:02 | 9  |
| HLA-A*68:02 | 10 |
| HLA-B*07:02 | 9  |
| HLA-B*07:02 | 10 |
| HLA-B*08:01 | 9  |
| HLA-B*08:01 | 10 |
| HLA-B*15:01 | 9  |
| HLA-B*15:01 | 10 |
| HLA-B*35:01 | 9  |
| HLA-B*35:01 | 10 |
| HLA-B*40:01 | 9  |
| HLA-B*40:01 | 10 |
| HLA-B*44:02 | 9  |
| HLA-B*44:02 | 10 |
| HLA-B*44:03 | 9  |
| HLA-B*44:03 | 10 |
| HLA-B*51:01 | 9  |
| HLA-B*51:01 | 10 |
| HLA-B*53:01 | 9  |
| HLA-B*53:01 | 10 |
| HLA-B*57:01 | 9  |
| HLA-B*57:01 | 10 |
| HLA-B*58:01 | 9  |
| HLA-B*58:01 | 10 |

**Table S3.** Allele for Major histocompatibility complex- II.

HLA-DRB1\*01:01  
HLA-DRB1\*03:01  
HLA-DRB1\*04:01  
HLA-DRB1\*04:05  
HLA-DRB1\*07:01  
HLA-DRB1\*08:02  
HLA-DRB1\*09:01  
HLA-DRB1\*11:01  
HLA-DRB1\*12:01  
HLA-DRB1\*13:02  
HLA-DRB1\*15:01  
HLA-DRB3\*01:01  
HLA-DRB3\*02:02  
HLA-DRB4\*01:01  
HLA-DRB5\*01:01  
HLA-DQA1\*05:01/DQB1\*02:01  
HLA-DQA1\*05:01/DQB1\*03:01  
HLA-DQA1\*03:01/DQB1\*03:02  
HLA-DQA1\*04:01/DQB1\*04:02  
HLA-DQA1\*01:01/DQB1\*05:01  
HLA-DQA1\*01:02/DQB1\*06:02  
HLA-DPA1\*02:01/DPB1\*01:01  
HLA-DPA1\*01:03/DPB1\*02:01  
HLA-DPA1\*01:03/DPB1\*04:01  
HLA-DPA1\*03:01/DPB1\*04:02  
HLA-DPA1\*02:01/DPB1\*05:01  
HLA-DPA1\*02:01/DPB1\*14:01

**Table S4.** Pairs of amino acid residues opted for disulfide engineering with Chi3 energy in kal/mol and sum B-factors.

| <b>Amino acid pair</b> | <b>Chi3</b> | <b>Energy</b> | <b>Sum B-Factors</b> |
|------------------------|-------------|---------------|----------------------|
| Ile2-Phe10             | -91.41      | 4.28          | 0                    |
| Leu13-Ile26            | 113.98      | 4.19          | 0                    |
| Ala17-26ile            | 76.34       | 4.65          | 0                    |
| Thr27-Thr40            | -65.95      | 5.22          | 0                    |
| Cys30-Tyr39            | -59.73      | 4.07          | 0                    |
| Ser47-Met58            | -62.7       | 4.74          | 0                    |
| Thr49-Ile61            | -104.97     | 3.37          | 0                    |
| Ala53-Val71            | 100.43      | 6.44          | 0                    |
| Phe63-Ala67            | 106.67      | 5.37          | 0                    |
| Met89-109              | -80.15      | 0.59          | 0                    |
| Ile95-Thr99            | -75.18      | 4.45          | 0                    |
| Glu100-Ile120          | 113.9       | 6.54          | 0                    |
| Val103-Ala119          | 104.46      | 5.76          | 0                    |
| Ala119-Ala132          | 74.01       | 2.77          | 0                    |
| Ser121-Pro133          | 111.77      | 2.74          | 0                    |
| Met122-Ala126          | 91.55       | 2.7           | 0                    |
| Thr134-Ile168          | 95.21       | 1.38          | 0                    |
| Ala136-Gly142          | -82.34      | 5.23          | 0                    |

**Table S5.** Population coverage analysis of vaccine epitopes.

[illegible]

|                            |            |      |          |            |      |          |            |       |          |
|----------------------------|------------|------|----------|------------|------|----------|------------|-------|----------|
| Belarus<br>Caucasoid       | 0.0%       | 0.0  | 0.0      | 43.81<br>% | 1.41 | 0.5<br>3 | 43.81<br>% | 1.41  | 0.5<br>3 |
|                            |            |      |          |            |      |          |            |       |          |
| Belgium                    | 99.39<br>% | 6.66 | 4.6<br>7 | 79.39<br>% | 3.11 | 1.4<br>6 | 99.87<br>% | 9.77  | 6.9<br>5 |
|                            |            |      |          |            |      |          |            |       |          |
| Belgium<br>Caucasoid       | 99.39<br>% | 6.66 | 4.6<br>7 | 79.39<br>% | 3.11 | 1.4<br>6 | 99.87<br>% | 9.77  | 6.9<br>5 |
|                            |            |      |          |            |      |          |            |       |          |
| Bolivia                    | 0.0%       | 0.0  | 0.0      | 77.82<br>% | 2.79 | 1.3<br>5 | 77.82<br>% | 2.79  | 1.3<br>5 |
|                            |            |      |          |            |      |          |            |       |          |
| Bolivia<br>Amerindian      | 0.0%       | 0.0  | 0.0      | 77.82<br>% | 2.79 | 1.3<br>5 | 77.82<br>% | 2.79  | 1.3<br>5 |
|                            |            |      |          |            |      |          |            |       |          |
| Borneo                     | 0.0%       | 0.0  | 0.0      | 49.02<br>% | 1.62 | 0.5<br>9 | 49.02<br>% | 1.62  | 0.5<br>9 |
|                            |            |      |          |            |      |          |            |       |          |
| Borneo<br>Austronesia<br>n | 0.0%       | 0.0  | 0.0      | 49.02<br>% | 1.62 | 0.5<br>9 | 49.02<br>% | 1.62  | 0.5<br>9 |
|                            |            |      |          |            |      |          |            |       |          |
| Brazil                     | 96.1%      | 5.85 | 3.6<br>9 | 63.8%      | 2.3  | 0.8<br>3 | 98.59<br>% | 8.16  | 5.2<br>2 |
|                            |            |      |          |            |      |          |            |       |          |
| Brazil<br>Amerindian       | 93.24<br>% | 4.12 | 3.1<br>9 | 48.6%      | 1.55 | 0.5<br>8 | 96.52<br>% | 5.67  | 3.6<br>6 |
|                            |            |      |          |            |      |          |            |       |          |
| Brazil<br>Caucasoid        | 99.32<br>% | 7.37 | 5.2<br>9 | 84.39<br>% | 3.49 | 1.9<br>2 | 99.89<br>% | 10.86 | 7.8<br>2 |
|                            |            |      |          |            |      |          |            |       |          |
| Brazil<br>Mixed            | 97.02<br>% | 6.41 | 3.9<br>9 | 77.5%      | 3.03 | 1.3<br>3 | 99.33<br>% | 9.44  | 6.4<br>1 |
|                            |            |      |          |            |      |          |            |       |          |
| Brazil<br>Mulatto          | 0.0%       | 0.0  | 0.0      | 74.09<br>% | 2.85 | 1.1<br>6 | 74.09<br>% | 2.85  | 1.1<br>6 |
|                            |            |      |          |            |      |          |            |       |          |
| Bulgaria                   | 99.42<br>% | 7.1  | 5.1      | 57.23<br>% | 2.01 | 0.7      | 99.75<br>% | 9.11  | 6.4<br>6 |
|                            |            |      |          |            |      |          |            |       |          |
| Bulgaria<br>Caucasoid      | 99.52<br>% | 7.2  | 5.2<br>6 | 57.23<br>% | 2.01 | 0.7      | 99.79<br>% | 9.21  | 6.5<br>3 |
|                            |            |      |          |            |      |          |            |       |          |
| Bulgaria<br>Other          | 99.58<br>% | 6.19 | 4.3<br>1 | 0.0%       | 0.0  | 0.0      | 99.58<br>% | 6.19  | 4.3<br>1 |



[illegible]

|                         |         |      |       |         |      |       |         |      |       |
|-------------------------|---------|------|-------|---------|------|-------|---------|------|-------|
| Chile Mixed             | 90.09 % | 4.82 | 3.0 1 | 52.65 % | 1.83 | 0.6 3 | 95.31 % | 6.64 | 3.7 3 |
|                         |         |      |       |         |      |       |         |      |       |
| China                   | 94.57 % | 5.41 | 3.4 3 | 59.99 % | 2.15 | 0.7 5 | 97.83 % | 7.57 | 4.5 3 |
|                         |         |      |       |         |      |       |         |      |       |
| China Oriental          | 94.57 % | 5.41 | 3.4 3 | 59.99 % | 2.15 | 0.7 5 | 97.83 % | 7.57 | 4.5 3 |
|                         |         |      |       |         |      |       |         |      |       |
| Colombia                | 8.36%   | 0.25 | 0.3 3 | 54.02 % | 1.88 | 0.6 5 | 57.86 % | 2.13 | 0.7 1 |
|                         |         |      |       |         |      |       |         |      |       |
| Colombia Amerindian     | 0.0%    | 0.0  | 0.0   | 47.4%   | 1.59 | 0.5 7 | 47.4%   | 1.59 | 0.5 7 |
|                         |         |      |       |         |      |       |         |      |       |
| Colombia Black          | 3.65%   | 0.11 | 0.3 1 | 65.25 % | 2.4  | 0.8 6 | 66.51 % | 2.51 | 0.9   |
|                         |         |      |       |         |      |       |         |      |       |
| Colombia Mestizo        | 14.07 % | 0.42 | 0.3 5 | 56.31 % | 1.97 | 0.6 9 | 62.45 % | 2.39 | 0.8   |
|                         |         |      |       |         |      |       |         |      |       |
| Congo                   | 0.0%    | 0.0  | 0.0   | 68.66 % | 2.54 | 0.9 6 | 68.66 % | 2.54 | 0.9 6 |
|                         |         |      |       |         |      |       |         |      |       |
| Congo Black             | 0.0%    | 0.0  | 0.0   | 68.66 % | 2.54 | 0.9 6 | 68.66 % | 2.54 | 0.9 6 |
|                         |         |      |       |         |      |       |         |      |       |
| Cook Islands            | 0.0%    | 0.0  | 0.0   | 78.59 % | 3.05 | 1.4   | 78.59 % | 3.05 | 1.4   |
|                         |         |      |       |         |      |       |         |      |       |
| Cook Islands Polynesian | 0.0%    | 0.0  | 0.0   | 78.59 % | 3.05 | 1.4   | 78.59 % | 3.05 | 1.4   |
|                         |         |      |       |         |      |       |         |      |       |
| Costa Rica              | 0.0%    | 0.0  | 0.0   | 24.31 % | 0.76 | 0.4   | 24.31 % | 0.76 | 0.4   |
|                         |         |      |       |         |      |       |         |      |       |
| Costa Rica Mestizo      | 0.0%    | 0.0  | 0.0   | 24.31 % | 0.76 | 0.4   | 24.31 % | 0.76 | 0.4   |
|                         |         |      |       |         |      |       |         |      |       |
| Croatia                 | 99.79 % | 7.96 | 6.1 8 | 66.71 % | 2.45 | 0.9   | 99.93 % | 10.4 | 7.4 3 |
|                         |         |      |       |         |      |       |         |      |       |
| Croatia Caucasoid       | 99.79 % | 7.96 | 6.1 8 | 66.71 % | 2.45 | 0.9   | 99.93 % | 10.4 | 7.4 3 |

[illegible]

|                               |            |      |          |            |      |          |            |       |           |
|-------------------------------|------------|------|----------|------------|------|----------|------------|-------|-----------|
| England<br>Caucasoid          | 99.93<br>% | 9.02 | 6.9<br>5 | 93.48<br>% | 4.21 | 3.2<br>2 | 100.0<br>% | 13.24 | 10.<br>42 |
|                               |            |      |          |            |      |          |            |       |           |
| Equatorial<br>Guinea          | 0.0%       | 0.0  | 0.0      | 47.58<br>% | 1.61 | 0.5<br>7 | 47.58<br>% | 1.61  | 0.5<br>7  |
|                               |            |      |          |            |      |          |            |       |           |
| Equatorial<br>Guinea<br>Black | 0.0%       | 0.0  | 0.0      | 47.58<br>% | 1.61 | 0.5<br>7 | 47.58<br>% | 1.61  | 0.5<br>7  |
|                               |            |      |          |            |      |          |            |       |           |
| Ethiopia                      | 0.0%       | 0.0  | 0.0      | 83.0%      | 3.27 | 1.7<br>6 | 83.0%      | 3.27  | 1.7<br>6  |
|                               |            |      |          |            |      |          |            |       |           |
| Ethiopia<br>Black             | 0.0%       | 0.0  | 0.0      | 83.0%      | 3.27 | 1.7<br>6 | 83.0%      | 3.27  | 1.7<br>6  |
|                               |            |      |          |            |      |          |            |       |           |
| Europe                        | 99.68<br>% | 8.05 | 6.1<br>7 | 85.83<br>% | 3.57 | 2.1<br>2 | 99.96<br>% | 11.62 | 8.9<br>7  |
|                               |            |      |          |            |      |          |            |       |           |
| Fiji                          | 0.0%       | 0.0  | 0.0      | 79.87<br>% | 2.95 | 1.4<br>9 | 79.87<br>% | 2.95  | 1.4<br>9  |
|                               |            |      |          |            |      |          |            |       |           |
| Fiji<br>Melanesian            | 0.0%       | 0.0  | 0.0      | 79.87<br>% | 2.95 | 1.4<br>9 | 79.87<br>% | 2.95  | 1.4<br>9  |
|                               |            |      |          |            |      |          |            |       |           |
| Finland                       | 99.99<br>% | 9.19 | 7.1<br>6 | 51.14<br>% | 1.75 | 0.6<br>1 | 100.0<br>% | 10.94 | 8.4<br>9  |
|                               |            |      |          |            |      |          |            |       |           |
| Finland<br>Caucasoid          | 99.99<br>% | 9.19 | 7.1<br>6 | 51.14<br>% | 1.75 | 0.6<br>1 | 100.0<br>% | 10.94 | 8.4<br>9  |
|                               |            |      |          |            |      |          |            |       |           |
| France                        | 99.8%      | 8.26 | 6.3<br>4 | 88.54<br>% | 3.78 | 2.6<br>2 | 99.98<br>% | 12.04 | 9.3<br>1  |
|                               |            |      |          |            |      |          |            |       |           |
| France<br>Caucasoid           | 99.8%      | 8.26 | 6.3<br>4 | 88.54<br>% | 3.78 | 2.6<br>2 | 99.98<br>% | 12.04 | 9.3<br>1  |
|                               |            |      |          |            |      |          |            |       |           |
| Gabon                         | 0.0%       | 0.0  | 0.0      | 41.78<br>% | 1.35 | 0.5<br>2 | 41.78<br>% | 1.35  | 0.5<br>2  |
|                               |            |      |          |            |      |          |            |       |           |
| Gabon<br>Black                | 0.0%       | 0.0  | 0.0      | 41.78<br>% | 1.35 | 0.5<br>2 | 41.78<br>% | 1.35  | 0.5<br>2  |
|                               |            |      |          |            |      |          |            |       |           |
| Georgia                       | 98.32<br>% | 6.77 | 4.4<br>1 | 75.05<br>% | 2.85 | 1.2      | 99.58<br>% | 9.62  | 6.6<br>3  |

|                            |            |      |          |            |      |          |            |       |          |
|----------------------------|------------|------|----------|------------|------|----------|------------|-------|----------|
| Georgia<br>Caucasoid       | 98.94<br>% | 7.1  | 4.8<br>3 | 75.05<br>% | 2.85 | 1.2      | 99.74<br>% | 9.95  | 6.9<br>1 |
|                            |            |      |          |            |      |          |            |       |          |
| Georgia<br>Kurd            | 98.19<br>% | 6.69 | 4.3<br>7 | 0.0%       | 0.0  | 0.0      | 98.19<br>% | 6.69  | 4.3<br>7 |
|                            |            |      |          |            |      |          |            |       |          |
| Germany                    | 99.93<br>% | 8.86 | 6.8      | 91.14<br>% | 4.0  | 3.0<br>7 | 99.99<br>% | 12.86 | 10.<br>0 |
|                            |            |      |          |            |      |          |            |       |          |
| Germany<br>Caucasoid       | 99.93<br>% | 8.86 | 6.8      | 91.14<br>% | 4.0  | 3.0<br>7 | 99.99<br>% | 12.86 | 10.<br>0 |
|                            |            |      |          |            |      |          |            |       |          |
| Greece                     | 0.0%       | 0.0  | 0.0      | 66.92<br>% | 2.47 | 0.9<br>1 | 66.92<br>% | 2.47  | 0.9<br>1 |
|                            |            |      |          |            |      |          |            |       |          |
| Greece<br>Caucasoid        | 0.0%       | 0.0  | 0.0      | 66.92<br>% | 2.47 | 0.9<br>1 | 66.92<br>% | 2.47  | 0.9<br>1 |
|                            |            |      |          |            |      |          |            |       |          |
| Guatemala                  | 7.76%      | 0.24 | 0.3<br>3 | 49.16<br>% | 1.61 | 0.5<br>9 | 53.11<br>% | 1.85  | 0.6<br>4 |
|                            |            |      |          |            |      |          |            |       |          |
| Guatemala<br>Amerindian    | 7.76%      | 0.24 | 0.3<br>3 | 49.16<br>% | 1.61 | 0.5<br>9 | 53.11<br>% | 1.85  | 0.6<br>4 |
|                            |            |      |          |            |      |          |            |       |          |
| Guinea-<br>Bissau          | 96.39<br>% | 6.37 | 3.8<br>9 | 71.16<br>% | 2.67 | 1.0<br>4 | 98.96<br>% | 9.04  | 6.1<br>1 |
|                            |            |      |          |            |      |          |            |       |          |
| Guinea-<br>Bissau<br>Black | 96.39<br>% | 6.37 | 3.8<br>9 | 71.16<br>% | 2.67 | 1.0<br>4 | 98.96<br>% | 9.04  | 6.1<br>1 |
|                            |            |      |          |            |      |          |            |       |          |
| Hong Kong                  | 96.05<br>% | 5.73 | 3.6<br>4 | 0.0%       | 0.0  | 0.0      | 96.05<br>% | 5.73  | 3.6<br>4 |
|                            |            |      |          |            |      |          |            |       |          |
| Hong Kong<br>Oriental      | 96.05<br>% | 5.73 | 3.6<br>4 | 0.0%       | 0.0  | 0.0      | 96.05<br>% | 5.73  | 3.6<br>4 |
|                            |            |      |          |            |      |          |            |       |          |
| India                      | 89.41<br>% | 4.74 | 2.8<br>3 | 74.99<br>% | 2.87 | 1.2      | 97.35<br>% | 7.6   | 4.4<br>6 |
|                            |            |      |          |            |      |          |            |       |          |
| India Asian                | 89.41<br>% | 4.74 | 2.8<br>3 | 74.99<br>% | 2.87 | 1.2      | 97.35<br>% | 7.6   | 4.4<br>6 |
|                            |            |      |          |            |      |          |            |       |          |
| Indonesia                  | 86.79<br>% | 4.38 | 2.2<br>7 | 47.84<br>% | 1.62 | 0.5<br>8 | 93.11<br>% | 6.0   | 3.3<br>5 |

[illegible]

[illegible]

|                       |         |      |          |         |      |          |         |      |          |
|-----------------------|---------|------|----------|---------|------|----------|---------|------|----------|
| Lebanon Arab          | 0.0%    | 0.0  | 0.0      | 70.46 % | 2.62 | 1.0<br>2 | 70.46 % | 2.62 | 1.0<br>2 |
|                       |         |      |          |         |      |          |         |      |          |
| Macedonia             | 26.72 % | 0.87 | 0.4<br>1 | 66.53 % | 2.45 | 0.9      | 75.47 % | 3.31 | 1.2<br>2 |
|                       |         |      |          |         |      |          |         |      |          |
| Macedonia Caucasoid   | 26.72 % | 0.87 | 0.4<br>1 | 66.53 % | 2.45 | 0.9      | 75.47 % | 3.31 | 1.2<br>2 |
|                       |         |      |          |         |      |          |         |      |          |
| Malaysia              | 81.38 % | 3.71 | 1.6<br>1 | 57.99 % | 2.05 | 0.7<br>1 | 92.18 % | 5.76 | 3.2<br>3 |
|                       |         |      |          |         |      |          |         |      |          |
| Malaysia Austronesian | 63.18 % | 2.52 | 0.8<br>1 | 55.38 % | 1.94 | 0.6<br>7 | 83.57 % | 4.46 | 1.8<br>3 |
|                       |         |      |          |         |      |          |         |      |          |
| Malaysia Oriental     | 87.82 % | 4.26 | 2.4<br>6 | 70.35 % | 2.58 | 1.0<br>1 | 96.39 % | 6.84 | 3.9<br>7 |
|                       |         |      |          |         |      |          |         |      |          |
| Mali                  | 96.02 % | 6.04 | 3.7<br>3 | 0.0%    | 0.0  | 0.0      | 96.02 % | 6.04 | 3.7<br>3 |
|                       |         |      |          |         |      |          |         |      |          |
| Mali Black            | 96.02 % | 6.04 | 3.7<br>3 | 0.0%    | 0.0  | 0.0      | 96.02 % | 6.04 | 3.7<br>3 |
|                       |         |      |          |         |      |          |         |      |          |
| Martinique            | 22.56 % | 0.68 | 0.3<br>9 | 74.51 % | 2.88 | 1.1<br>8 | 80.26 % | 3.56 | 1.5<br>2 |
|                       |         |      |          |         |      |          |         |      |          |
| Martinique Black      | 22.56 % | 0.68 | 0.3<br>9 | 74.51 % | 2.88 | 1.1<br>8 | 80.26 % | 3.56 | 1.5<br>2 |
|                       |         |      |          |         |      |          |         |      |          |
| Mexico                | 97.97 % | 5.98 | 3.9<br>5 | 55.04 % | 1.91 | 0.6<br>7 | 99.09 % | 7.89 | 5.2<br>3 |
|                       |         |      |          |         |      |          |         |      |          |
| Mexico Amerindian     | 99.87 % | 6.68 | 4.9<br>5 | 42.59 % | 1.38 | 0.5<br>2 | 99.93 % | 8.06 | 6.1      |
|                       |         |      |          |         |      |          |         |      |          |
| Mexico Mestizo        | 98.13 % | 6.24 | 4.0<br>9 | 68.51 % | 2.54 | 0.9<br>5 | 99.41 % | 8.77 | 6.1<br>6 |
|                       |         |      |          |         |      |          |         |      |          |
| Mongolia              | 95.31 % | 4.43 | 3.3<br>7 | 81.85 % | 3.34 | 1.6<br>5 | 99.15 % | 7.77 | 5.6<br>7 |
|                       |         |      |          |         |      |          |         |      |          |
| Mongolia Oriental     | 95.31 % | 4.43 | 3.3<br>7 | 81.85 % | 3.34 | 1.6<br>5 | 99.15 % | 7.77 | 5.6<br>7 |



[illegible]

|                             |         |      |       |         |      |       |         |       |       |
|-----------------------------|---------|------|-------|---------|------|-------|---------|-------|-------|
| North America               | 99.06 % | 7.34 | 5.1   | 87.89 % | 3.74 | 2.4 8 | 99.89 % | 11.09 | 8.0 4 |
|                             |         |      |       |         |      |       |         |       |       |
| Northeast Asia              | 94.7%   | 5.45 | 3.4 5 | 59.99 % | 2.15 | 0.7 5 | 97.88 % | 7.6   | 4.5 6 |
|                             |         |      |       |         |      |       |         |       |       |
| Norway                      | 0.0%    | 0.0  | 0.0   | 94.71 % | 4.34 | 3.3 2 | 94.71 % | 4.34  | 3.3 2 |
|                             |         |      |       |         |      |       |         |       |       |
| Norway Caucasoid            | 0.0%    | 0.0  | 0.0   | 94.71 % | 4.34 | 3.3 2 | 94.71 % | 4.34  | 3.3 2 |
|                             |         |      |       |         |      |       |         |       |       |
| Oceania                     | 94.71 % | 4.99 | 3.3 7 | 59.87 % | 2.13 | 0.7 5 | 97.88 % | 7.12  | 4.3 1 |
|                             |         |      |       |         |      |       |         |       |       |
| Oman                        | 99.69 % | 7.84 | 6.1 3 | 0.0%    | 0.0  | 0.0   | 99.69 % | 7.84  | 6.1 3 |
|                             |         |      |       |         |      |       |         |       |       |
| Oman Arab                   | 99.69 % | 7.84 | 6.1 3 | 0.0%    | 0.0  | 0.0   | 99.69 % | 7.84  | 6.1 3 |
|                             |         |      |       |         |      |       |         |       |       |
| Pakistan                    | 97.09 % | 4.77 | 3.6 1 | 1.18%   | 0.04 | 0.3   | 97.13 % | 4.81  | 3.6 2 |
|                             |         |      |       |         |      |       |         |       |       |
| Pakistan Asian              | 96.75 % | 4.73 | 3.5 6 | 1.45%   | 0.04 | 0.3   | 96.79 % | 4.77  | 3.5 8 |
|                             |         |      |       |         |      |       |         |       |       |
| Pakistan Mixed              | 97.73 % | 4.84 | 3.6 8 | 0.0%    | 0.0  | 0.3   | 97.73 % | 4.84  | 3.6 8 |
|                             |         |      |       |         |      |       |         |       |       |
| Papua New Guinea            | 97.92 % | 4.45 | 3.4 5 | 69.15 % | 2.52 | 0.9 7 | 99.36 % | 6.97  | 4.6 2 |
|                             |         |      |       |         |      |       |         |       |       |
| Papua New Guinea Melanesian | 97.92 % | 4.45 | 3.4 5 | 69.15 % | 2.52 | 0.9 7 | 99.36 % | 6.97  | 4.6 2 |
|                             |         |      |       |         |      |       |         |       |       |
| Paraguay                    | 0.0%    | 0.0  | 0.0   | 4.9%    | 0.15 | 0.3 2 | 4.9%    | 0.15  | 0.3 2 |
|                             |         |      |       |         |      |       |         |       |       |
| Paraguay Amerindian         | 0.0%    | 0.0  | 0.0   | 4.9%    | 0.15 | 0.3 2 | 4.9%    | 0.15  | 0.3 2 |
|                             |         |      |       |         |      |       |         |       |       |
| Peru                        | 99.99 % | 5.89 | 4.1 9 | 49.87 % | 1.64 | 0.6   | 100.0 % | 7.54  | 5.3 6 |

|                                 |            |      |          |            |      |          |            |       |          |
|---------------------------------|------------|------|----------|------------|------|----------|------------|-------|----------|
| Peru<br>Amerindian              | 99.99<br>% | 5.89 | 4.1<br>9 | 49.87<br>% | 1.64 | 0.6      | 100.0<br>% | 7.54  | 5.3<br>6 |
|                                 |            |      |          |            |      |          |            |       |          |
| Philippines                     | 94.98<br>% | 4.72 | 3.3<br>5 | 28.56<br>% | 0.91 | 0.4<br>2 | 96.41<br>% | 5.63  | 3.6      |
|                                 |            |      |          |            |      |          |            |       |          |
| Philippines<br>Austronesia<br>n | 94.98<br>% | 4.72 | 3.3<br>5 | 28.56<br>% | 0.91 | 0.4<br>2 | 96.41<br>% | 5.63  | 3.6      |
|                                 |            |      |          |            |      |          |            |       |          |
| Poland                          | 99.77<br>% | 8.06 | 6.2<br>1 | 84.46<br>% | 3.47 | 1.9<br>3 | 99.96<br>% | 11.53 | 8.8<br>7 |
|                                 |            |      |          |            |      |          |            |       |          |
| Poland<br>Caucasoid             | 99.77<br>% | 8.06 | 6.2<br>1 | 84.46<br>% | 3.47 | 1.9<br>3 | 99.96<br>% | 11.53 | 8.8<br>7 |
|                                 |            |      |          |            |      |          |            |       |          |
| Portugal                        | 98.72<br>% | 7.11 | 4.7<br>6 | 78.0%      | 3.05 | 1.3<br>6 | 99.72<br>% | 10.15 | 7.0<br>2 |
|                                 |            |      |          |            |      |          |            |       |          |
| Portugal<br>Caucasoid           | 98.72<br>% | 7.11 | 4.7<br>6 | 78.0%      | 3.05 | 1.3<br>6 | 99.72<br>% | 10.15 | 7.0<br>2 |
|                                 |            |      |          |            |      |          |            |       |          |
| Romania                         | 99.67<br>% | 7.7  | 6.0<br>2 | 0.0%       | 0.0  | 0.0      | 99.67<br>% | 7.7   | 6.0<br>2 |
|                                 |            |      |          |            |      |          |            |       |          |
| Romania<br>Caucasoid            | 99.67<br>% | 7.7  | 6.0<br>2 | 0.0%       | 0.0  | 0.0      | 99.67<br>% | 7.7   | 6.0<br>2 |
|                                 |            |      |          |            |      |          |            |       |          |
| Russia                          | 99.27<br>% | 7.18 | 5.0<br>7 | 77.62<br>% | 3.07 | 1.3<br>4 | 99.84<br>% | 10.25 | 7.1<br>8 |
|                                 |            |      |          |            |      |          |            |       |          |
| Russia<br>Caucasoid             | 3.96%      | 0.12 | 0.3<br>1 | 88.52<br>% | 3.79 | 2.6<br>1 | 88.97<br>% | 3.91  | 2.7<br>2 |
|                                 |            |      |          |            |      |          |            |       |          |
| Russia<br>Mixed                 | 5.05%      | 0.15 | 0.3<br>2 | 0.0%       | 0.0  | 0.0      | 5.05%      | 0.15  | 0.3<br>2 |
|                                 |            |      |          |            |      |          |            |       |          |
| Russia<br>Other                 | 99.98<br>% | 7.54 | 6.1<br>5 | 85.01<br>% | 3.48 | 2.0      | 100.0<br>% | 11.02 | 8.5      |
|                                 |            |      |          |            |      |          |            |       |          |
| Russia<br>Siberian              | 99.43<br>% | 7.64 | 5.7      | 78.83<br>% | 3.13 | 1.4<br>2 | 99.88<br>% | 10.77 | 7.6<br>6 |
|                                 |            |      |          |            |      |          |            |       |          |
| Rwanda                          | 24.87<br>% | 0.8  | 0.4      | 62.79<br>% | 2.24 | 0.8<br>1 | 72.05<br>% | 3.04  | 1.0<br>7 |

|                                      |            |      |          |            |      |          |            |      |          |
|--------------------------------------|------------|------|----------|------------|------|----------|------------|------|----------|
| Rwanda<br>Black                      | 24.87<br>% | 0.8  | 0.4      | 62.79<br>% | 2.24 | 0.8<br>1 | 72.05<br>% | 3.04 | 1.0<br>7 |
|                                      |            |      |          |            |      |          |            |      |          |
| Samoa                                | 0.0%       | 0.0  | 0.0      | 80.86<br>% | 3.18 | 1.5<br>7 | 80.86<br>% | 3.18 | 1.5<br>7 |
|                                      |            |      |          |            |      |          |            |      |          |
| Samoa<br>Polynesian                  | 0.0%       | 0.0  | 0.0      | 80.86<br>% | 3.18 | 1.5<br>7 | 80.86<br>% | 3.18 | 1.5<br>7 |
|                                      |            |      |          |            |      |          |            |      |          |
| Sao Tome<br>and<br>Principe          | 97.02<br>% | 6.65 | 4.1<br>2 | 66.5%      | 2.43 | 0.9      | 99.0%      | 9.08 | 6.1<br>5 |
|                                      |            |      |          |            |      |          |            |      |          |
| Sao Tome<br>and<br>Principe<br>Black | 97.02<br>% | 6.65 | 4.1<br>2 | 66.5%      | 2.43 | 0.9      | 99.0%      | 9.08 | 6.1<br>5 |
|                                      |            |      |          |            |      |          |            |      |          |
| Saudi<br>Arabia                      | 98.26<br>% | 6.61 | 4.3<br>4 | 80.14<br>% | 3.15 | 1.5<br>1 | 99.65<br>% | 9.75 | 6.7<br>8 |
|                                      |            |      |          |            |      |          |            |      |          |
| Saudi<br>Arabia<br>Arab              | 98.26<br>% | 6.61 | 4.3<br>4 | 80.14<br>% | 3.15 | 1.5<br>1 | 99.65<br>% | 9.75 | 6.7<br>8 |
|                                      |            |      |          |            |      |          |            |      |          |
| Scotland                             | 65.34<br>% | 2.62 | 0.8<br>7 | 90.82<br>% | 3.94 | 3.0<br>5 | 96.82<br>% | 6.56 | 3.9<br>5 |
|                                      |            |      |          |            |      |          |            |      |          |
| Scotland<br>Caucasoid                | 65.34<br>% | 2.62 | 0.8<br>7 | 90.82<br>% | 3.94 | 3.0<br>5 | 96.82<br>% | 6.56 | 3.9<br>5 |
|                                      |            |      |          |            |      |          |            |      |          |
| Senegal                              | 95.58<br>% | 5.94 | 3.6<br>5 | 30.28<br>% | 0.98 | 0.4<br>3 | 96.92<br>% | 6.91 | 4.0<br>8 |
|                                      |            |      |          |            |      |          |            |      |          |
| Senegal<br>Black                     | 95.58<br>% | 5.94 | 3.6<br>5 | 30.28<br>% | 0.98 | 0.4<br>3 | 96.92<br>% | 6.91 | 4.0<br>8 |
|                                      |            |      |          |            |      |          |            |      |          |
| Serbia                               | 73.37<br>% | 2.8  | 1.1<br>3 | 0.0%       | 0.0  | 0.0      | 73.37<br>% | 2.8  | 1.1<br>3 |
|                                      |            |      |          |            |      |          |            |      |          |
| Serbia<br>Caucasoid                  | 73.37<br>% | 2.8  | 1.1<br>3 | 0.0%       | 0.0  | 0.0      | 73.37<br>% | 2.8  | 1.1<br>3 |
|                                      |            |      |          |            |      |          |            |      |          |
| Singapore                            | 92.66<br>% | 5.13 | 3.2<br>3 | 65.78<br>% | 2.4  | 0.8<br>8 | 97.49<br>% | 7.53 | 4.4<br>4 |

[illegible]

[illegible]

[illegible]

[illegible]



|                               |              |             |                  |              |             |                  |              |             |                  |
|-------------------------------|--------------|-------------|------------------|--------------|-------------|------------------|--------------|-------------|------------------|
| Venezuela<br>Mestizo          | 9.75%        | 0.29        | 0.3<br>3         | 0.0%         | 0.0         | 0.0              | 9.75%        | 0.29        | 0.3<br>3         |
|                               |              |             |                  |              |             |                  |              |             |                  |
| Venezuela<br>Mixed            | 0.0%         | 0.0         | 0.0              | 3.17%        | 0.1         | 0.3<br>1         | 3.17%        | 0.1         | 0.3<br>1         |
|                               |              |             |                  |              |             |                  |              |             |                  |
| Vietnam                       | 91.82<br>%   | 5.0         | 3.1<br>5         | 54.44<br>%   | 1.9         | 0.6<br>6         | 96.27<br>%   | 6.89        | 3.9<br>4         |
|                               |              |             |                  |              |             |                  |              |             |                  |
| Vietnam<br>Oriental           | 91.82<br>%   | 5.0         | 3.1<br>5         | 54.44<br>%   | 1.9         | 0.6<br>6         | 96.27<br>%   | 6.89        | 3.9<br>4         |
|                               |              |             |                  |              |             |                  |              |             |                  |
| Wales                         | 1.0%         | 0.03        | 0.3              | 0.0%         | 0.0         | 0.0              | 1.0%         | 0.03        | 0.3              |
|                               |              |             |                  |              |             |                  |              |             |                  |
| Wales<br>Caucasoid            | 1.0%         | 0.03        | 0.3              | 0.0%         | 0.0         | 0.0              | 1.0%         | 0.03        | 0.3              |
|                               |              |             |                  |              |             |                  |              |             |                  |
| West<br>Africa                | 95.49<br>%   | 6.03        | 3.6<br>6         | 65.23<br>%   | 2.4         | 0.8<br>6         | 98.43<br>%   | 8.43        | 5.3<br>2         |
|                               |              |             |                  |              |             |                  |              |             |                  |
| West Indies                   | 98.98<br>%   | 7.5         | 5.2<br>5         | 69.22<br>%   | 2.59        | 0.9<br>7         | 99.69<br>%   | 10.09       | 6.9<br>4         |
|                               |              |             |                  |              |             |                  |              |             |                  |
| World                         | 98.55<br>%   | 6.9         | 4.5<br>4         | 81.81<br>%   | 3.32        | 1.6<br>5         | 99.74<br>%   | 10.22       | 7.0<br>7         |
|                               |              |             |                  |              |             |                  |              |             |                  |
| Zambia                        | 98.1%        | 6.42        | 4.1<br>6         | 0.0%         | 0.0         | 0.0              | 98.1%        | 6.42        | 4.1<br>6         |
|                               |              |             |                  |              |             |                  |              |             |                  |
| Zambia<br>Black               | 98.1%        | 6.42        | 4.1<br>6         | 0.0%         | 0.0         | 0.0              | 98.1%        | 6.42        | 4.1<br>6         |
|                               |              |             |                  |              |             |                  |              |             |                  |
| Zimbabwe                      | 93.79<br>%   | 5.43        | 3.3<br>7         | 68.3%        | 2.51        | 0.9<br>5         | 98.03<br>%   | 7.95        | 4.8<br>4         |
|                               |              |             |                  |              |             |                  |              |             |                  |
| Zimbabwe<br>Black             | 93.79<br>%   | 5.43        | 3.3<br>7         | 68.3%        | 2.51        | 0.9<br>5         | 98.03<br>%   | 7.95        | 4.8<br>4         |
|                               |              |             |                  |              |             |                  |              |             |                  |
| <b>Average</b>                | <b>63.06</b> | <b>4.0</b>  | <b>2.7<br/>1</b> | <b>55.3</b>  | <b>2.11</b> | <b>1.0<br/>4</b> | <b>82.92</b> | <b>6.11</b> | <b>4.0<br/>2</b> |
| <b>Standard<br/>deviation</b> | <b>43.68</b> | <b>3.13</b> | <b>2.2<br/>7</b> | <b>30.26</b> | <b>1.26</b> | <b>0.8<br/>3</b> | <b>25.25</b> | <b>3.59</b> | <b>2.8<br/>5</b> |

**Table S6.** Docking score of vaccine with MHC-I.

| Cluster | Members | Representative | Weighted Score |
|---------|---------|----------------|----------------|
| 0       | 138     | Center         | -733.6         |
|         |         | Lowest Energy  | -799.3         |
| 1       | 95      | Center         | -586.8         |
|         |         | Lowest Energy  | -638.1         |
| 2       | 71      | Center         | -608.9         |
|         |         | Lowest Energy  | -608.9         |
| 3       | 59      | Center         | -596.1         |
|         |         | Lowest Energy  | -624.6         |
| 4       | 42      | Center         | -556.0         |
|         |         | Lowest Energy  | -642.2         |
| 5       | 39      | Center         | -590.9         |
|         |         | Lowest Energy  | -627.9         |
| 6       | 36      | Center         | -650.3         |
|         |         | Lowest Energy  | -658.9         |
| 7       | 35      | Center         | -674.5         |
|         |         | Lowest Energy  | -674.5         |
| 8       | 34      | Center         | -665.4         |
|         |         | Lowest Energy  | -665.4         |
| 9       | 31      | Center         | -579.0         |
|         |         | Lowest Energy  | -606.3         |
| 10      | 30      | Center         | -699.5         |
|         |         | Lowest Energy  | -699.5         |

**Table S7.** Docking score of vaccine with MHC-II.

| Cluster | Members | Representative | Weighted Score |
|---------|---------|----------------|----------------|
| 0       | 87      | Center         | -696.0         |
|         |         | Lowest Energy  | -821.4         |
| 1       | 76      | Center         | -648.9         |

| Cluster | Members | Representative | Weighted Score |
|---------|---------|----------------|----------------|
|         |         | Lowest Energy  | -789.4         |
| 2       | 68      | Center         | -743.2         |
|         |         | Lowest Energy  | -743.2         |
| 3       | 64      | Center         | -796.4         |
|         |         | Lowest Energy  | -796.4         |
| 4       | 53      | Center         | -748.8         |
|         |         | Lowest Energy  | -748.8         |
| 5       | 46      | Center         | -755.9         |
|         |         | Lowest Energy  | -794.5         |
| 6       | 40      | Center         | -645.6         |
|         |         | Lowest Energy  | -713.9         |
| 7       | 38      | Center         | -786.6         |
|         |         | Lowest Energy  | -786.6         |
| 8       | 37      | Center         | -696.5         |
|         |         | Lowest Energy  | -752.1         |
| 9       | 29      | Center         | -650.5         |
|         |         | Lowest Energy  | -789.0         |
| 10      | 29      | Center         | -642.3         |
|         |         | Lowest Energy  | -790.5         |

**Table S8.** Docking score of vaccine with TLR-4.

| Cluster | Members | Representative | Weighted Score |
|---------|---------|----------------|----------------|
| 0       | 82      | Center         | -691.7         |
|         |         | Lowest Energy  | -783.6         |
| 1       | 46      | Center         | -758.5         |
|         |         | Lowest Energy  | -758.5         |
| 2       | 44      | Center         | -607.5         |

| Cluster   | Members | Representative | Weighted Score |
|-----------|---------|----------------|----------------|
|           |         | Lowest Energy  | -803.3         |
| <b>3</b>  | 36      | Center         | -646.0         |
|           |         | Lowest Energy  | -699.0         |
| <b>4</b>  | 35      | Center         | -637.6         |
|           |         | Lowest Energy  | -704.1         |
| <b>5</b>  | 34      | Center         | -695.4         |
|           |         | Lowest Energy  | -703.4         |
| <b>6</b>  | 32      | Center         | -678.9         |
|           |         | Lowest Energy  | -752.2         |
| <b>7</b>  | 31      | Center         | -667.6         |
|           |         | Lowest Energy  | -832.6         |
| <b>8</b>  | 31      | Center         | -704.5         |
|           |         | Lowest Energy  | -711.0         |
| <b>9</b>  | 30      | Center         | -709.4         |
|           |         | Lowest Energy  | -709.4         |
| <b>10</b> | 30      | Center         | -691.2         |
|           |         | Lowest Energy  | -691.2         |
